# Supplementary material
Source: publisher site journal article supplement (https://www.dovepress.com/article/supplementary_file/578352/578352%20Supplementary%20Figures.docx)
Supplement: Supplementary file 1 [file 578352%20Supplementary%20Figures.docx]

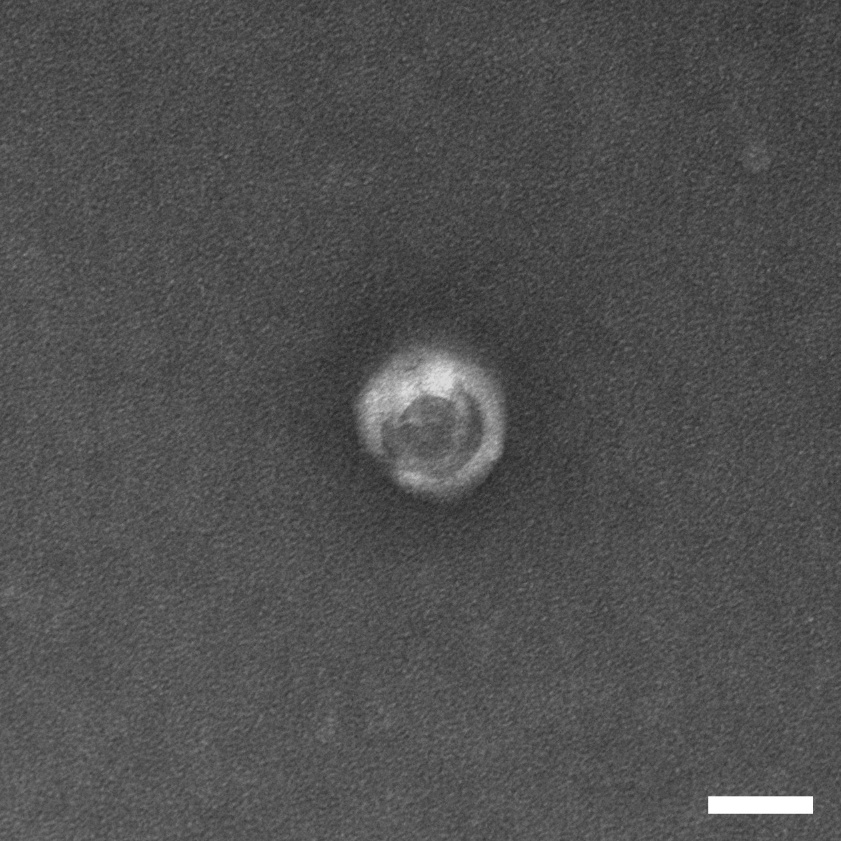


**Supplementary Figure S1.** TEM images of Exos-AM. Bar = 100nm.

**
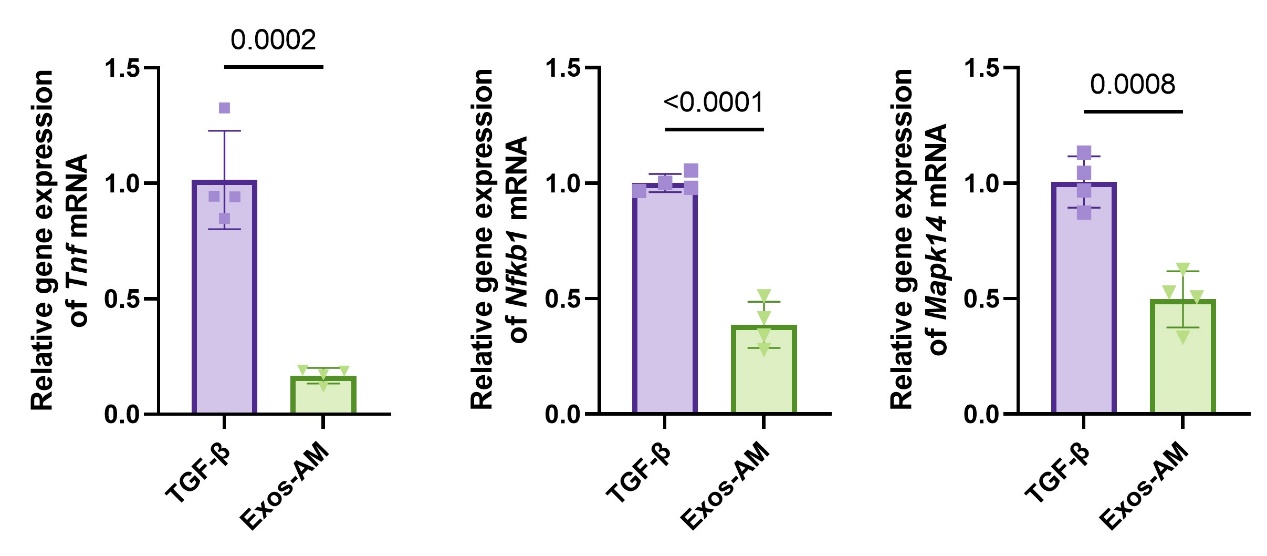
**

**Supplementary Figure S2.** Relative mRNA expression levels of *Tnf*, *Nfkb1*, and *Mapk14* in RAW264.7. Data are presented as mean ± SD.
